# Supplementary material for: LAMP2A facilitates lipid droplet production and chemoresistance of colorectal cancer cells by maintaining ING5 protein stability
Source: Research Square preprint supplement (doi:10.21203/rs.3.rs-1373107/v1), 2022-04-12
Supplement: Supplementary file 1 [file 5a69f3820056c22f3bc49b58.docx]

Table S1. Primary antibody used for western blot

| **Num** | **Antibody** | **Species** | **Dilution** | **Company** |
| --- | --- | --- | --- | --- |
| 1 | β-actin(13E5) | rabbit | 1:1000 | CST |
| 2 | Lamp2A[EPR4207(2)] | rabbit | 1:2000 | Abcam |
| 3 | ING5 | rabbit | 1:1000 | Proteintech |
| 4 | NF-κB p65(D14E12) | rabbit | 1:1000 | CST |
| 5 | Acetyl-CoA carboxylase (C83B10) | rabbit | 1:1000 | CST |
| 6 | ATP-citrate lyase (D1X6P) | rabbit | 1:1000 | CST |
| 7 | Bcl-2 (D55G8) | rabbit | 1:1000 | CST |
| 8 | Bax(B-9) | Mouse | 1:1000 | Santa Cruz |
